# Supplementary material
Source: PubMed Central journal article supplement (PMC3561774)
Supplement: supp_jeb.079715_JEB079715.pdf [file supp_jeb.079715_JEB079715.pdf]

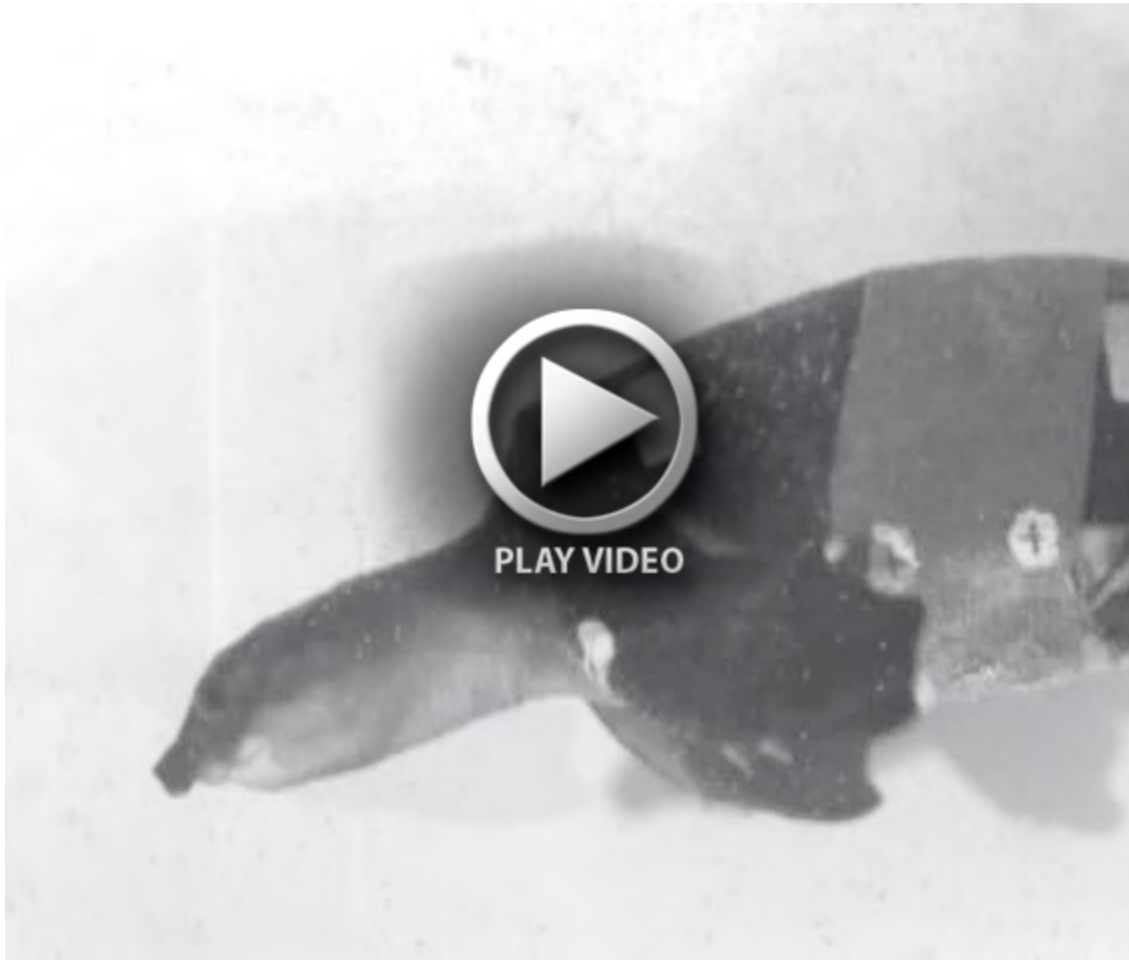

**Movie 1.** Representative video of swimming in *Carettochelys insculpta*.

Table S1. Sample sizes for kinematic analyses for each turtle from each species

| Individual                     | <i>N</i> |
|--------------------------------|----------|
| <i>Apalone ferox</i>           |          |
| AF01                           | 20       |
| AF02                           | 20       |
| AF03                           | 25       |
| AF04                           | 22       |
| AF05                           | 20       |
| AF06                           | 24       |
| AF07                           | 20       |
| AF08                           | 22       |
| AF09                           | 22       |
| <i>Carettochelys insculpta</i> |          |
| Flipper                        | 22       |
| Chiquita                       | 17       |
| <i>Caretta caretta</i>         |          |
| Log04                          | 11       |
| Log05                          | 8        |
| Log07                          | 14       |
| <i>Trachemys scripta</i>       |          |
| TS02                           | 16       |
| TS09                           | 20       |
| TS11                           | 20       |
| TS14                           | 20       |
| TS31                           | 20       |
| TS36                           | 20       |
| TS99                           | 20       |

Data for *Trachemys scripta* were provided by Rivera and Blob (Rivera and Blob, 2010). Data for *Caretta caretta* were provided by Rivera et al. (Rivera, A. R. V. et al., 2011).
